# Supplementary material
Source: PubMed Central journal article supplement (PMC4600458)

Figure 1a

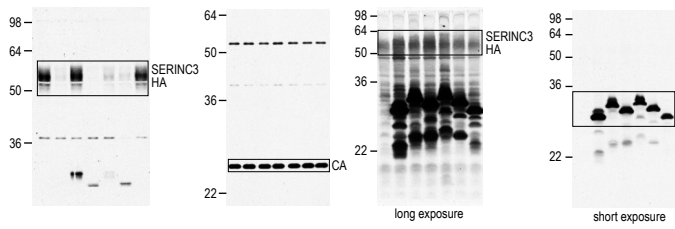

Figure 1b

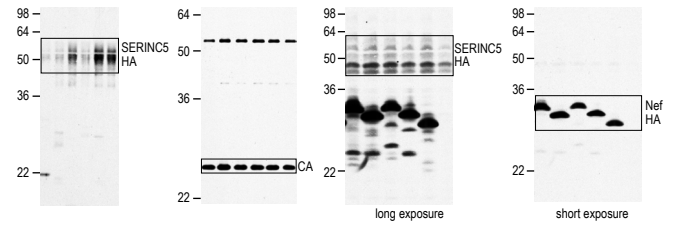

Figure 2b

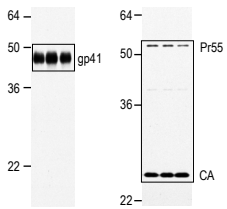

Figure 2e

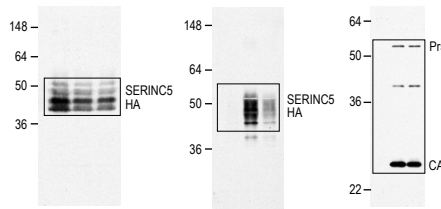

Figure 3a

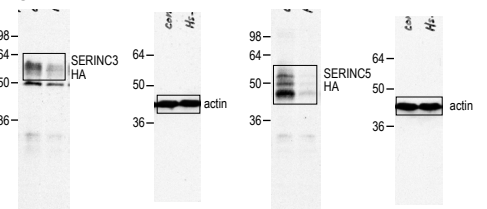

Figure 3f

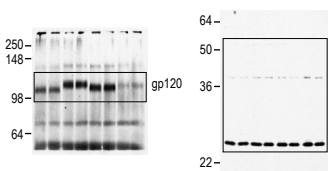

Figure 5a

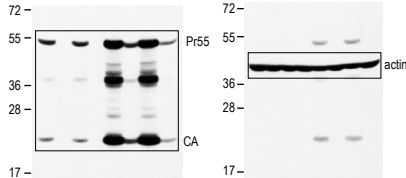

Figure 5b

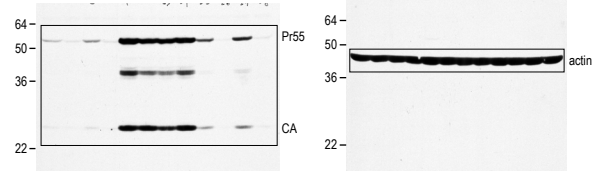

Ext Data Fig 2a

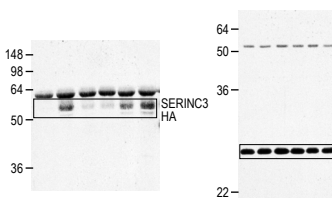

Ext Data Fig 2b

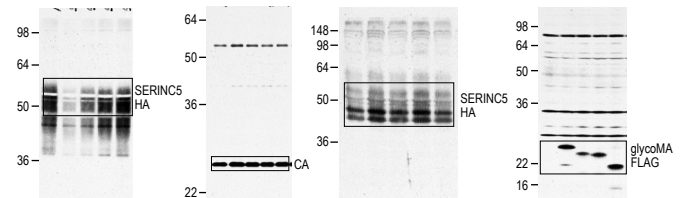

Ext Data Fig 1a

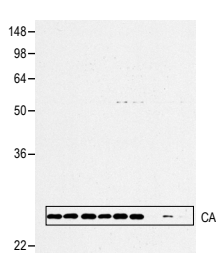

Ext Data Fig 7

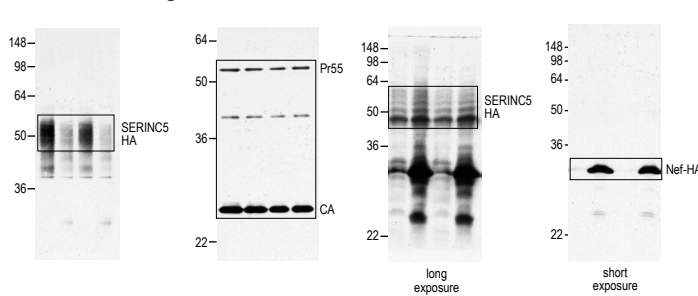

Ext Data Fig 9a

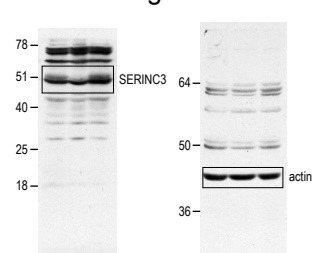

Ext Data Fig 10

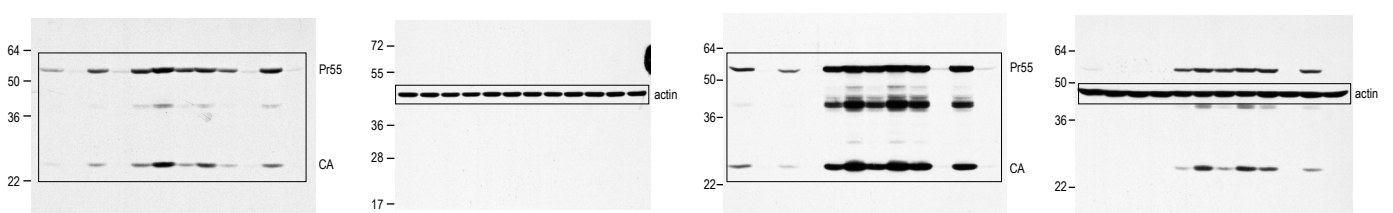

Supplement: NIHMS717025-supplement-Scans.pdf [file NIHMS717025-supplement-Scans.pdf]
